# Supplementary material for: Reference gene screening of Batrachochytrium dendrobatidis and Batrachochytrium salamandrivorans for quantitative real-time PCR studies
Source: PubMed Central journal article supplement (PMC6898426; doi:10.1038/s41598-019-54582-4), 2019-12-06
Supplement: 41598_2019_54582_MOESM1_ESM.pdf [file 41598_2019_54582_MOESM1_ESM.pdf]

**Reference gene screening of *Batrachochytrium dendrobatidis* and  
*Batrachochytrium salamandrivorans* for quantitative real-time PCR studies**

Elin Verbrugghe<sup>1</sup>, Frank Pasmans<sup>1</sup>, An Martel<sup>1</sup>

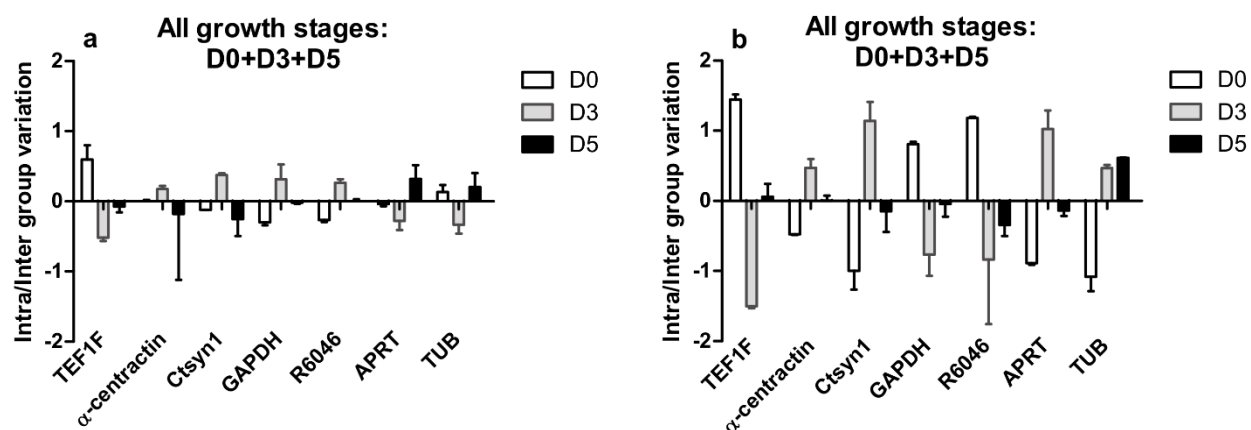

**Supplementary Figure S1: Intra- and intergroup variation as estimated by NormFinder.** The columns represent the intergroup variation and the error bars indicate the intragroup variations of (a) *Bd* and (b) *Bsal* candidate reference genes between spores day 0 (D0) (n = 6), sporangia day 3 (D3) (n = 6) and mature sporangia day 5 (D5) (n = 6). The most stable gene would be that having as small error bars as possible and with an intergroup variation close to zero.

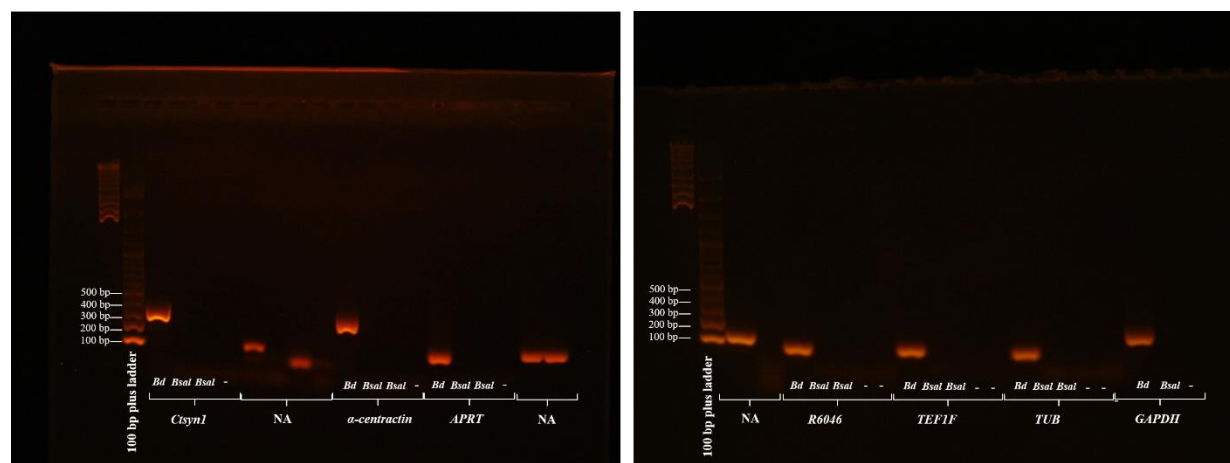

**Supplementary Figure S2: Agarose gel electrophoresis of *Bd* PCR products.** Shown are full-length gels showing the PCR products of the tested *Bd* reference genes (*Ctsyn1*, *alpha-centractin*, *APRT*, *R6046*, *TEF1F*, *TUB* and *GAPDH*) using *Bd* and *Bsal* cDNA (1/5 diluted). For every primer pair a water template control was included (-). Ladder = generuler 100 bp plus (Thermo Scientific). NA = not applicable for this article.

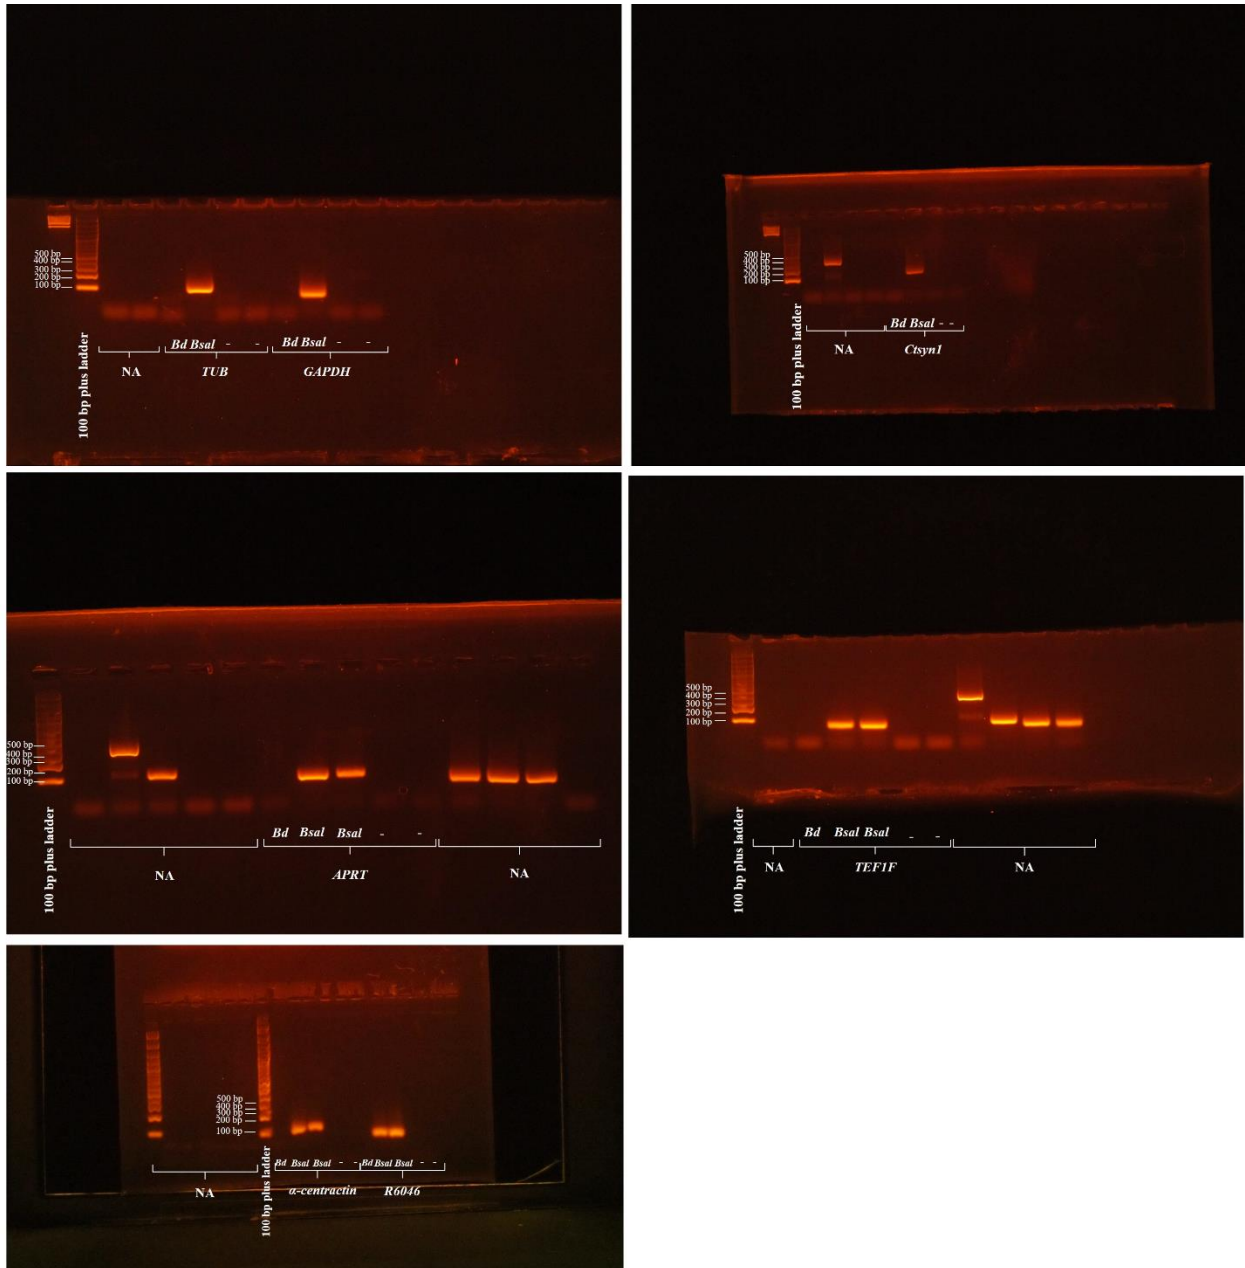

**Supplementary Figure S3: Agarose gel electrophoresis of *Bsal* PCR products.** Shown are full-length gels showing the PCR products of the tested *Bsal* reference genes (*Ctsyn1*,  $\alpha$ -*centractin*, *APRT*, *R6046*, *TEF1F*, *TUB* and *GAPDH*) using *Bd* and *Bsal* cDNA (1/5 diluted). For every primer pair a water template control was included (-). Ladder = generuler 100 bp plus (Thermo Scientific). NA = not applicable for this article.

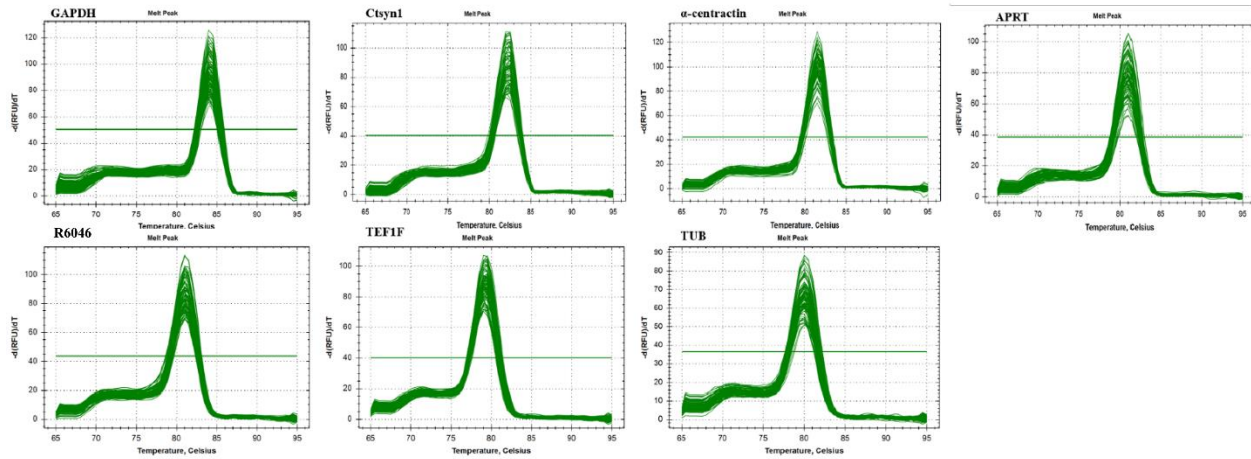

**Supplementary Figure S4: Melting curve analysis of *Bd* amplicons.** Melting curves of 7 *Bd* genes ( $\alpha$ -centractin, *Ctsyn1*, *APRT*, *R6046*, *TEF*, *TUB*, *GAPDH*) showing single peaks.

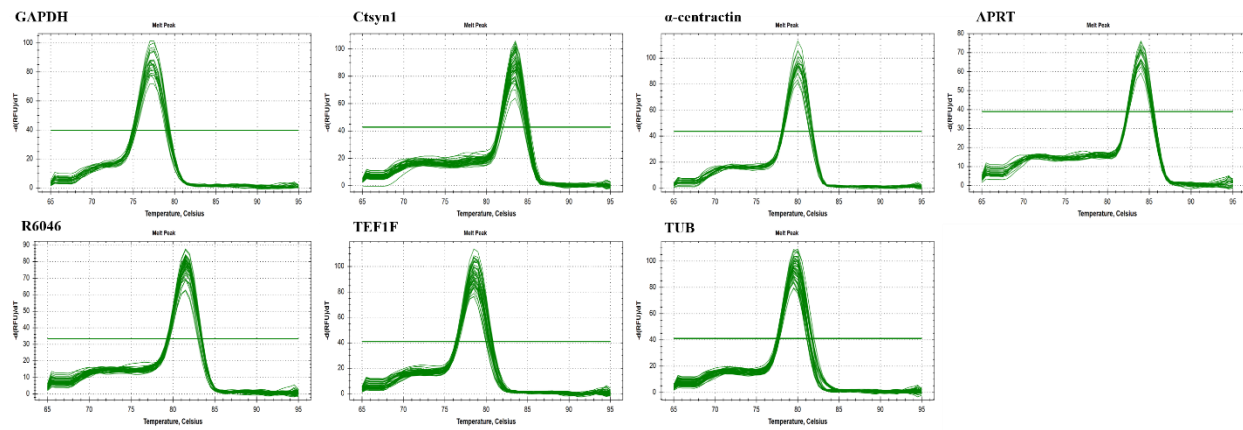

**Supplementary Figure S5: Melting curve analysis of *Bsal* amplicons.** Melting curves of 7 *Bsal* genes ( $\alpha$ -centractin, *Ctsyn1*, *APRT*, *R6046*, *TEF*, *TUB*, *GAPDH*) showing single peaks.

**Supplementary Table S1: Cq values of all individual samples.**

|              | <i>Bd</i>                                                                 | <i>α-centractin</i> | <i>Ctsyn1</i> | <i>APRT</i> | <i>R6046</i> | <i>TEF1F</i> | <i>TUB</i> | <i>GAPDH</i> |       |
|--------------|---------------------------------------------------------------------------|---------------------|---------------|-------------|--------------|--------------|------------|--------------|-------|
| experiment 1 | Spores D0                                                                 | 1                   | 29.41         | 29.96       | 28.83        | 28.40        | 27.61      | 27.49        | 29.91 |
|              |                                                                           | 2                   | 28.66         | 28.82       | 27.96        | 27.41        | 25.27      | 27.11        | 28.64 |
|              |                                                                           | 3                   | 27.98         | 28.47       | 27.76        | 27.63        | 26.30      | 27.31        | 28.06 |
|              |                                                                           | 4                   | 28.47         | 28.80       | 28.10        | 27.88        | 25.62      | 27.22        | 28.35 |
|              |                                                                           | 5                   | 28.29         | 28.63       | 28.42        | 28.06        | 25.29      | 27.71        | 28.23 |
|              |                                                                           | 6                   | 29.37         | 29.80       | 28.56        | 28.57        | 27.05      | 28.11        | 29.26 |
|              | Sporangia D3                                                              | 1                   | 26.22         | 26.14       | 26.90        | 24.24        | 24.76      | 26.41        | 24.29 |
|              |                                                                           | 2                   | 26.63         | 26.55       | 26.71        | 25.29        | 26.04      | 26.58        | 26.05 |
|              |                                                                           | 3                   | 26.21         | 26.21       | 26.68        | 25.31        | 26.18      | 26.08        | 26.23 |
|              |                                                                           | 4                   | 26.15         | 26.38       | 26.47        | 25.46        | 26.19      | 26.39        | 26.36 |
|              |                                                                           | 5                   | 27.08         | 26.58       | 26.49        | 26.20        | 26.24      | 26.31        | 26.87 |
|              |                                                                           | 6                   | 27.29         | 27.24       | 27.37        | 25.76        | 26.30      | 26.13        | 26.25 |
|              | Mature sporangia D5                                                       | 1                   | 25.70         | 26.32       | 25.31        | 25.59        | 24.70      | 25.36        | 25.98 |
|              |                                                                           | 2                   | 25.52         | 26.12       | 25.86        | 25.19        | 25.28      | 25.15        | 26.08 |
|              |                                                                           | 3                   | 26.90         | 26.96       | 25.40        | 25.61        | 25.15      | 24.98        | 26.07 |
|              |                                                                           | 4                   | 24.58         | 25.02       | 24.42        | 23.66        | 23.41      | 24.19        | 23.87 |
|              |                                                                           | 5                   | 30.70         | 29.56       | 26.07        | 26.54        | 25.84      | 25.79        | 27.71 |
|              |                                                                           | 6                   | 27.12         | 28.48       | 26.28        | 25.83        | 25.35      | 25.65        | 27.12 |
| experiment 2 | 2 x 10 <sup>7</sup> spores 2 hours H <sub>2</sub> O                       | 1                   | 29.25         | 30.53       | 28.56        | 28.42        | 27.62      | 27.76        | 29.38 |
|              |                                                                           | 2                   | 34.15         | 31.69       | 33.08        | 30.43        | 29.14      | 30.61        | 34.51 |
|              |                                                                           | 3                   | 32.69         | 30.52       | 29.36        | 28.28        | 27.98      | 28.22        | 30.39 |
|              |                                                                           | 4                   | 30.24         | 30.41       | 28.35        | 28.18        | 27.84      | 27.48        | 29.18 |
|              | 2 x 10 <sup>7</sup> spores 2 hours H <sub>2</sub> O + tissue midwife toad | 1                   | 30.13         | 31.35       | 30.75        | 28.24        | 28.01      | 29.00        | 30.59 |
|              |                                                                           | 2                   | 29.65         | 30.72       | 29.30        | 28.21        | 27.06      | 28.48        | 30.26 |
|              |                                                                           | 3                   | 32.50         | 33.36       | 32.07        | 31.65        | 30.82      | 31.22        | 33.02 |
|              |                                                                           | 4                   | 27.74         | 28.08       | 27.67        | 27.21        | 26.23      | 26.93        | 28.06 |
|              | 5 x 10 <sup>7</sup> spores 2 hours H <sub>2</sub> O                       | 1                   | 26.93         | 27.49       | 27.51        | 26.62        | 24.54      | 26.55        | 27.49 |
|              |                                                                           | 2                   | 30.41         | 33.05       | 30.42        | 26.62        | 27.33      | 28.58        | 31.84 |
|              |                                                                           | 3                   | 25.43         | 26.91       | 27.89        | 27.02        | 24.65      | 27.21        | 28.15 |
|              |                                                                           | 4                   | 27.55         | 28.14       | 28.14        | 26.76        | 24.17      | 26.51        | 28.68 |
|              | 5 x 10 <sup>7</sup> spores 2 hours H <sub>2</sub> O + tissue midwife toad | 1                   | 30.40         | 31.22       | 30.25        | 29.01        | 27.47      | 29.48        | 31.06 |
|              |                                                                           | 2                   | 30.28         | 31.53       | 30.80        | 27.21        | 25.48      | 29.00        | 30.65 |
|              |                                                                           | 3                   | 28.09         | 28.22       | 28.73        | 26.86        | 25.24      | 27.18        | 28.78 |
|              |                                                                           | 4                   | 29.61         | 29.58       | 28.96        | 28.85        | 28.68      | 28.29        | 30.22 |
| experiment 3 | spores                                                                    | 1                   | 29.41         | 29.96       | 28.83        | 28.40        | 27.61      | 27.49        | 29.91 |
|              |                                                                           | 2                   | 28.66         | 28.82       | 27.96        | 27.41        | 25.27      | 27.11        | 28.64 |
|              |                                                                           | 3                   | 27.98         | 28.47       | 27.76        | 27.63        | 26.30      | 27.31        | 28.06 |
|              |                                                                           | 4                   | 28.47         | 28.80       | 28.10        | 27.88        | 25.62      | 27.22        | 28.35 |
|              |                                                                           | 5                   | 28.29         | 28.63       | 28.42        | 28.06        | 25.29      | 27.71        | 28.23 |

|              |   |                                                                              |                     |               |             |              |              |            |              |
|--------------|---|------------------------------------------------------------------------------|---------------------|---------------|-------------|--------------|--------------|------------|--------------|
|              | 6 |                                                                              | 29.37               | 29.80         | 28.56       | 28.57        | 27.05        | 28.11      | 29.26        |
|              | 1 | <i>Bd</i> -infected skin of midwife toads                                    | 30.62               | 32.63         | 30.98       | 28.48        | 27.13        | 31.57      | 28.70        |
|              | 2 |                                                                              | 32.54               | 33.08         | 32.30       | 29.64        | 29.39        | 32.31      | 30.34        |
|              | 3 |                                                                              | 28.57               | 28.40         | 28.67       | 25.32        | 24.77        | 28.31      | 25.93        |
|              | 4 |                                                                              | 27.87               | 29.59         | 28.94       | 25.85        | 25.65        | 28.04      | 26.16        |
|              | 5 |                                                                              | ND                  | ND            | ND          | ND           | ND           | ND         | ND           |
|              | 6 |                                                                              | 30.60               | 32.05         | 30.83       | 27.67        | 27.22        | 31.07      | 27.75        |
|              |   | <i>Bsal</i>                                                                  | <i>α-centractin</i> | <i>Ctsyn1</i> | <i>APRT</i> | <i>R6046</i> | <i>TEF1F</i> | <i>TUB</i> | <i>GAPDH</i> |
| experiment 1 | 1 | Spores D0                                                                    | 26.36               | 27.88         | 28.58       | 22.07        | 20.33        | 23.33      | 20.79        |
|              | 2 |                                                                              | 26.39               | 28.10         | 29.06       | 21.85        | 19.56        | 23.25      | 20.42        |
|              | 3 |                                                                              | 27.21               | 29.70         | 29.61       | 22.40        | 20.76        | 23.97      | 21.43        |
|              | 4 |                                                                              | 27.17               | 29.88         | 29.85       | 23.26        | 21.04        | 24.28      | 21.73        |
|              | 5 |                                                                              | 24.82               | 25.99         | 27.01       | 20.44        | 17.71        | 22.62      | 19.63        |
|              | 6 |                                                                              | 24.95               | 25.74         | 26.97       | 20.74        | 18.01        | 22.99      | 19.49        |
|              | 1 | Sporangia D3                                                                 | 27.2                | 27.04         | 28.18       | 28.54        | 26.19        | 23.51      | 25.59        |
|              | 2 |                                                                              | 27.9                | 27.77         | 28.53       | 26.69        | 26.83        | 23.43      | 25.12        |
|              | 3 |                                                                              | 26.87               | 26.73         | 27.86       | 27.12        | 26.62        | 24.35      | 25.86        |
|              | 4 |                                                                              | 26.95               | 27.43         | 28.42       | 24.08        | 25.21        | 22.52      | 22.94        |
|              | 5 |                                                                              | 27.53               | 27.63         | 28.32       | 29.02        | 26.77        | 24.63      | 26.82        |
|              | 6 |                                                                              | 28.09               | 28.00         | 29.06       | 28.63        | 27.18        | 24.43      | 26.63        |
|              | 1 | Mature sporangia D5                                                          | 27.36               | 28.32         | 29.37       | 26.07        | 23.94        | 22.89      | 23.53        |
|              | 2 |                                                                              | 28.17               | 28.08         | 29.42       | 27.09        | 24.70        | 23.49      | 25.59        |
|              | 3 |                                                                              | 26.94               | 28.24         | 28.78       | 25.26        | 21.87        | 22.41      | 22.67        |
|              | 4 |                                                                              | 27.18               | 28.36         | 29.24       | 25.64        | 23.45        | 22.63      | 23.17        |
|              | 5 |                                                                              | 28.06               | 29.59         | 30.19       | 25.25        | 23.31        | 23.35      | 23.84        |
|              | 6 |                                                                              | 28.43               | 30.73         | 30.99       | 28.07        | 25.53        | 24.40      | 25.48        |
| experiment 2 | 1 | 5 x 10 <sup>6</sup> spores 2 hours H <sub>2</sub> O                          | 28.39               | 29.44         | 30.74       | 24.96        | 21.55        | 26.14      | 23.31        |
|              | 2 |                                                                              | 28.38               | 29.62         | 30.04       | 24.13        | 21.76        | 25.78      | 23.91        |
|              | 3 |                                                                              | 28.09               | 28.17         | 30.58       | 24.26        | 21.38        | 25.84      | 22.31        |
|              | 4 |                                                                              | 28.12               | 30.16         | 31.5        | 23.87        | 21.75        | 25.73      | 22.44        |
|              | 5 |                                                                              | 28.94               | 30.56         | 31.94       | 25.15        | 22.3         | 26.25      | 23.76        |
|              | 1 | 5 x 10 <sup>6</sup> spores 2 hours H <sub>2</sub> O + tissue fire salamander | 28.47               | 29.33         | 30.88       | 25.01        | 21.78        | 26.13      | 23.38        |
|              | 2 |                                                                              | 28.09               | 29.52         | 30.38       | 24.21        | 21.63        | 25.8       | 22.78        |
|              | 3 |                                                                              | 27.9                | 28.83         | 30.57       | 24.27        | 21.29        | 25.76      | 22.68        |
|              | 4 |                                                                              | 28.11               | 30.31         | 30.94       | 23.96        | 21.72        | 25.55      | 22.23        |
|              | 5 |                                                                              | 29                  | 30.56         | 30.69       | 25.26        | 22.5         | 26.24      | 23.93        |
|              | 1 | 10 <sup>7</sup> spores 2 hours H <sub>2</sub> O                              | 27.05               | 27.16         | 29.03       | 23.47        | 21.14        | 24.88      | 21.4         |
|              | 2 |                                                                              | 27.74               | 27.41         | 28.52       | 24.04        | 21.95        | 26.57      | 23.07        |
|              | 3 |                                                                              | 26.95               | 28.99         | 29.69       | 22.46        | 20.77        | 24.18      | 20.09        |
|              | 4 |                                                                              | 27.23               | 27.64         | 28.5        | 23.03        | 20.89        | 26.04      | 21.79        |

|              |   |                                                                             |                                                       |       |       |       |       |       |       |
|--------------|---|-----------------------------------------------------------------------------|-------------------------------------------------------|-------|-------|-------|-------|-------|-------|
|              | 5 |                                                                             | excluded from analysis -> deviant amplification curve |       |       |       |       |       |       |
|              | 1 | 10 <sup>7</sup> spores 2 hours H <sub>2</sub> O +<br>tissue fire salamander | 28.68                                                 | 27.98 | 30.76 | 25.51 | 21.91 | 26.5  | 23.48 |
|              | 2 |                                                                             | 28.42                                                 | 27.61 | 30.63 | 24.71 | 21.59 | 25.84 | 23.5  |
|              | 3 |                                                                             | 28.12                                                 | 27.07 | 29.47 | 24.21 | 20.67 | 25.22 | 22.41 |
|              | 4 |                                                                             | 28.85                                                 | 28.21 | 31.21 | 25.58 | 21.83 | 26.16 | 23.65 |
|              | 5 |                                                                             | 28.19                                                 | 27.44 | 29.22 | 24.62 | 21.08 | 26.02 | 23.03 |
|              | 1 | spores                                                                      | 27.31                                                 | 28.41 | 28.97 | 21.89 | 19.61 | 24.09 | 21.00 |
|              | 2 |                                                                             | 26.64                                                 | 28.86 | 28.6  | 21.53 | 19.42 | 23.4  | 20.48 |
|              | 3 |                                                                             | 27.46                                                 | 30.00 | 30.29 | 22.94 | 21.08 | 24.05 | 21.47 |
|              | 4 |                                                                             | 27.55                                                 | 30.02 | 30.3  | 22.88 | 21.01 | 24.32 | 21.63 |
|              | 5 |                                                                             | 24.59                                                 | 26.34 | 26.92 | 20.41 | 17.69 | 22.92 | 19.37 |
|              | 6 |                                                                             | 24.93                                                 | 25.8  | 27.28 | 20.87 | 18.15 | 22.94 | 19.33 |
|              | 1 | <i>Bsal</i> -infected skin (chin) of<br>fire salamander 1                   | 28.97                                                 | 29.29 | 33.63 | 27.02 | 24.96 | 28.54 | 25.11 |
|              | 2 | <i>Bsal</i> -infected skin (belly) of<br>fire salamander 1                  | 29.16                                                 | 31.84 | ND    | 27.2  | 27.89 | 29.75 | 28.07 |
|              | 3 | <i>Bsal</i> -infected skin (tail) of<br>fire salamander 1                   | 30.75                                                 | 31.82 | 34.67 | 28.89 | 29.19 | 30.32 | 28.76 |
|              | 4 | <i>Bsal</i> -infected skin (chin) of<br>fire salamander 2                   | 31.06                                                 | ND    | ND    | 29.17 | 28.78 | 30.05 | 28.12 |
|              | 5 | <i>Bsal</i> -infected skin (belly) of<br>fire salamander 2                  | 30.33                                                 | 30.94 | ND    | 27.97 | 27.33 | 29.21 | 27.21 |
|              | 6 | <i>Bsal</i> -infected skin (tail) of<br>fire salamander 2                   | 29.44                                                 | 29.65 | 33.52 | 26.88 | 25.21 | 28.57 | 25.12 |
|              | 7 | <i>Bsal</i> -infected skin (chin) of<br>fire salamander 3                   | 30.5                                                  | 31.69 | ND    | 27.6  | 27.56 | 30.94 | 29.26 |
|              | 8 | <i>Bsal</i> -infected skin (belly) of<br>fire salamander 3                  | ND                                                    | ND    | ND    | ND    | ND    | ND    | ND    |
| experiment 3 | 9 | <i>Bsal</i> -infected skin (tail) of<br>fire salamander 3                   | ND                                                    | ND    | ND    | ND    | ND    | ND    | 32.48 |

ND = no signal detected

**Supplementary Table S2: Ranking of genes' CT variation across different growth stages of *Bd* and *Bsal*.**

| <i>Bd</i>   | All growth stages: D0+D3+D5 |       |       | Spores D0           |       |       | Sporangia D3        |       |       | Mature sporangia D5 |       |       |
|-------------|-----------------------------|-------|-------|---------------------|-------|-------|---------------------|-------|-------|---------------------|-------|-------|
| Rank        | Gene                        | Mean  | Stdev | Gene                | Mean  | Stdev | Gene                | Mean  | Stdev | Gene                | Mean  | Stdev |
| 1           | <i>TEF1F</i>                | 25.70 | 0.94  | <i>TUB</i>          | 27.49 | 0.37  | <i>TUB</i>          | 26.32 | 0.19  | <i>TUB</i>          | 25.19 | 0.57  |
| 2           | <i>TUB</i>                  | 26.33 | 1.04  | <i>APRT</i>         | 28.27 | 0.40  | <i>APRT</i>         | 26.77 | 0.33  | <i>APRT</i>         | 25.56 | 0.67  |
| 3           | <i>APRT</i>                 | 26.87 | 1.23  | <i>R6046</i>        | 27.99 | 0.44  | <i>Ctsyn1</i>       | 26.52 | 0.40  | <i>TEF1F</i>        | 25.00 | 0.84  |
| 4           | <i>R6046</i>                | 26.26 | 1.43  | <i>α-centractin</i> | 28.70 | 0.58  | <i>α-centractin</i> | 26.6  | 0.49  | <i>R6046</i>        | 25.40 | 0.96  |
| 5           | <i>Ctsyn1</i>               | 27.56 | 1.50  | <i>Ctsyn1</i>       | 29.08 | 0.63  | <i>TEF1F</i>        | 25.95 | 0.59  | <i>GAPDH</i>        | 26.14 | 1.31  |
| 6           | <i>α-centractin</i>         | 27.35 | 1.58  | <i>GAPDH</i>        | 28.74 | 0.71  | <i>R6046</i>        | 25.38 | 0.65  | <i>Ctsyn1</i>       | 27.08 | 1.67  |
| 7           | <i>GAPDH</i>                | 26.96 | 1.60  | <i>TEF1F</i>        | 26.19 | 0.97  | <i>GAPDH</i>        | 26.01 | 0.89  | <i>α-centractin</i> | 26.75 | 2.15  |
| <i>Bsal</i> | All growth stages: D0+D3+D5 |       |       | Spores D0           |       |       | Sporangia D3        |       |       | Mature sporangia D5 |       |       |
| Rank        | Gene                        | Mean  | Stdev | Gene                | Mean  | Stdev | Gene                | Mean  | Stdev | Gene                | Mean  | Stdev |
| 1           | <i>TUB</i>                  | 23.47 | 0.72  | <i>TUB</i>          | 23.41 | 0.62  | <i>APRT</i>         | 28.40 | 0.40  | <i>α-centractin</i> | 27.69 | 0.61  |
| 2           | <i>α-centractin</i>         | 27.09 | 0.99  | <i>GAPDH</i>        | 20.58 | 0.92  | <i>Ctsyn1</i>       | 27.43 | 0.47  | <i>TUB</i>          | 23.20 | 0.72  |
| 3           | <i>APRT</i>                 | 28.86 | 1.02  | <i>α-centractin</i> | 26.15 | 1.05  | <i>α-centractin</i> | 27.42 | 0.50  | <i>APRT</i>         | 29.67 | 0.79  |
| 4           | <i>Ctsyn1</i>               | 28.07 | 1.30  | <i>R6046</i>        | 21.79 | 1.05  | <i>TEF1F</i>        | 26.47 | 0.69  | <i>Ctsyn1</i>       | 28.89 | 1.05  |
| 5           | <i>GAPDH</i>                | 23.37 | 2.40  | <i>APRT</i>         | 28.51 | 1.26  | <i>TUB</i>          | 23.81 | 0.81  | <i>R6046</i>        | 26.23 | 1.13  |
| 6           | <i>R6046</i>                | 25.12 | 2.79  | <i>TEF1F</i>        | 19.57 | 1.42  | <i>GAPDH</i>        | 25.49 | 1.40  | <i>GAPDH</i>        | 24.05 | 1.22  |
| 7           | <i>TEF1F</i>                | 23.28 | 3.12  | <i>Ctsyn1</i>       | 27.88 | 1.76  | <i>R6046</i>        | 27.35 | 1.85  | <i>TEF1F</i>        | 23.80 | 1.26  |



**Supplementary Table S3: Comprehensive ranking of *Bd* reference gene stability using different statistical algorithms.** Delta CT, BestKeeper, NormFinder, GeNorm and RefFinder were used to determine reference gene stability in *Bd* spores day 0 (D0) (n = 6), sporangia day 3 (D3) (n = 6), mature sporangia day 5 (D5) (n = 6) and a combination of all life stages (D0+D3+D5) (n = 18). Candidate genes were ranked from most stable (1) to least stable (7).

| D0+D3+D5  | rank | ΔCT                        | Bestkeeper analysis        |                            |                            | NormFinder                 | GeNorm                     | RefFinder                  |
|-----------|------|----------------------------|----------------------------|----------------------------|----------------------------|----------------------------|----------------------------|----------------------------|
|           |      | SD                         | SD                         | CV                         | r                          | stability value            | M value                    | Geomean                    |
| <i>Bd</i> | 1    | <i>R6046</i> (0.78)        | <i>TEF1F</i> (0.72)        | <i>TEF1F</i> (2.79)        | <i>GAPDH</i> (0.97)        | <i>R6046</i> (0.27)        | <i>APRT</i> (0.58)         | <i>R6046</i> (1.86)        |
|           | 2    | <i>GAPDH</i> (0.84)        | <i>TUB</i> (0.82)          | <i>TUB</i> (3.10)          | <i>R6046</i> (0.96)        | <i>α-centractin</i> (0.30) | <i>TUB</i> (0.58)          | <i>APRT</i> (2.63)         |
|           | 3    | <i>CtsynI</i> (0.86)       | <i>APRT</i> (1.00)         | <i>APRT</i> (3.71)         | <i>CtsynI</i> (0.94)       | <i>GAPDH</i> (0.33)        | <i>R6046</i> (0.65)        | <i>TUB</i> (2.66)          |
|           | 4    | <i>APRT</i> (0.87)         | <i>R6046</i> (1.19)        | <i>R6046</i> (4.52)        | <i>α-centractin</i> (0.90) | <i>CtsynI</i> (0.35)       | <i>GAPDH</i> (0.73)        | <i>GAPDH</i> (3.13)        |
|           | 5    | <i>TUB</i> (0.88)          | <i>α-centractin</i> (1.27) | <i>α-centractin</i> (4.65) | <i>APRT</i> (0.89)         | <i>APRT</i> (0.35)         | <i>CtsynI</i> (0.78)       | <i>CtsynI</i> (4.21)       |
|           | 6    | <i>α-centractin</i> (0.99) | <i>GAPDH</i> (1.29)        | <i>GAPDH</i> (4.77)        | <i>TUB</i> (0.88)          | <i>TUB</i> (0.39)          | <i>α-centractin</i> (0.83) | <i>TEF1F</i> (4.30)        |
|           | 7    | <i>TEF1F</i> (1.08)        | <i>CtsynI</i> (1.34)       | <i>CtsynI</i> (4.86)       | <i>TEF1F</i> (0.77)        | <i>TEF1F</i> (0.51)        | <i>TEF1F</i> (0.90)        | <i>α-centractin</i> (5.73) |

| D0        | rank | ΔCT                        | Bestkeeper analysis        |                            |                            | NormFinder                 | GeNorm                     | RefFinder                  |
|-----------|------|----------------------------|----------------------------|----------------------------|----------------------------|----------------------------|----------------------------|----------------------------|
|           |      | SD                         | SD                         | CV                         | r                          | stability value            | M value                    | Geomean                    |
| <i>Bd</i> | 1    | <i>CtsynI</i> (0.36)       | <i>TUB</i> (0.28)          | <i>TUB</i> (1.01)          | <i>CtsynI</i> (0.98)       | <i>CtsynI</i> (0.06)       | <i>CtsynI</i> (0.16)       | <i>CtsynI</i> (1.50)       |
|           | 2    | <i>α-centractin</i> (0.38) | <i>APRT</i> (0.33)         | <i>APRT</i> (1.17)         | <i>α-centractin</i> (0.93) | <i>α-centractin</i> (0.14) | <i>α-centractin</i> (0.18) | <i>α-centractin</i> (2.00) |
|           | 3    | <i>R6046</i> (0.41)        | <i>R6046</i> (0.35)        | <i>R6046</i> (1.26)        | <i>GAPDH</i> (0.93)        | <i>R6046</i> (0.17)        | <i>GAPDH</i> (0.19)        | <i>APRT</i> (3.36)         |
|           | 4    | <i>APRT</i> (0.41)         | <i>α-centractin</i> (0.46) | <i>α-centractin</i> (1.61) | <i>R6046</i> (0.89)        | <i>APRT</i> (0.18)         | <i>APRT</i> (0.29)         | <i>R6046</i> (3.41)        |
|           | 5    | <i>GAPDH</i> (0.44)        | <i>CtsynI</i> (0.53)       | <i>CtsynI</i> (1.83)       | <i>TEF1F</i> (0.89)        | <i>GAPDH</i> (0.21)        | <i>R6046</i> (0.32)        | <i>TUB</i> (3.83)          |
|           | 6    | <i>TUB</i> (0.53)          | <i>GAPDH</i> (0.56)        | <i>GAPDH</i> (1.96)        | <i>APRT</i> (0.88)         | <i>TUB</i> (0.32)          | <i>TUB</i> (0.37)          | <i>GAPDH</i> (4.61)        |
|           | 7    | <i>TEF1F</i> (0.70)        | <i>TEF1F</i> (0.80)        | <i>TEF1F</i> (3.04)        | <i>TUB</i> (0.64)          | <i>TEF1F</i> (0.45)        | <i>TEF1F</i> (0.46)        | <i>TEF1F</i> (7.00)        |

| D3        | rank | ΔCT                        | Bestkeeper analysis        |                            |                            | NormFinder                 | GeNorm                     | RefFinder                  |
|-----------|------|----------------------------|----------------------------|----------------------------|----------------------------|----------------------------|----------------------------|----------------------------|
|           |      | SD                         | SD                         | CV                         | r                          | stability value            | M value                    | Geomean                    |
| <i>Bd</i> | 1    | <i>CtsynI</i> (0.48)       | <i>TUB</i> (0.14)          | <i>TUB</i> (0.54)          | <i>R6046</i> (0.95)        | <i>CtsynI</i> (0.15)       | <i>α-centractin</i> (0.36) | <i>CtsynI</i> (1.32)       |
|           | 2    | <i>α-centractin</i> (0.52) | <i>APRT</i> (0.24)         | <i>APRT</i> (0.91)         | <i>TEF1F</i> (0.90)        | <i>α-centractin</i> (0.21) | <i>CtsynI</i> (0.37)       | <i>α-centractin</i> (2.11) |
|           | 3    | <i>TEF1F</i> (0.52)        | <i>CtsynI</i> (0.27)       | <i>CtsynI</i> (1.03)       | <i>GAPDH</i> (0.89)        | <i>TEF1F</i> (0.21)        | <i>R6046</i> (0.42)        | <i>TEF1F</i> (3.46)        |
|           | 4    | <i>R6046</i> (0.52)        | <i>TEF1F</i> (0.40)        | <i>α-centractin</i> (1.52) | <i>CtsynI</i> (0.79)       | <i>R6046</i> (0.23)        | <i>TEF1F</i> (0.44)        | <i>TUB</i> (3.66)          |
|           | 5    | <i>APRT</i> (0.62)         | <i>α-centractin</i> (0.40) | <i>TEF1F</i> (1.53)        | <i>α-centractin</i> (0.78) | <i>TUB</i> (0.36)          | <i>APRT</i> (0.49)         | <i>R6046</i> (4.12)        |
|           | 6    | <i>TUB</i> (0.64)          | <i>R6046</i> (0.43)        | <i>R6046</i> (1.69)        | <i>APRT</i> (0.11)         | <i>APRT</i> (0.36)         | <i>TUB</i> (0.52)          | <i>APRT</i> (4.16)         |
|           | 7    | <i>GAPDH</i> (0.71)        | <i>GAPDH</i> (0.57)        | <i>GAPDH</i> (2.20)        | <i>TUB</i> (0.30)          | <i>GAPDH</i> (0.46)        | <i>GAPDH</i> (0.57)        | <i>GAPDH</i> (7.00)        |

| D5        | rank | ΔCT                        | Bestkeeper analysis        |                            |                            | NormFinder                 | GeNorm                     | RefFinder                  |
|-----------|------|----------------------------|----------------------------|----------------------------|----------------------------|----------------------------|----------------------------|----------------------------|
|           |      | SD                         | SD                         | CV                         | r                          | stability value            | M value                    | Geomean                    |
| <i>Bd</i> | 1    | <i>R6046</i> (0.70)        | <i>TUB</i> (0.41)          | <i>TUB</i> (1.64)          | <i>GAPDH</i> (0.98)        | <i>GAPDH</i> (0.13)        | <i>APRT</i> (0.30)         | <i>TUB</i> (2.24)          |
|           | 2    | <i>TEF1F</i> (0.72)        | <i>APRT</i> (0.51)         | <i>APRT</i> (2.01)         | <i>Ctsyn1</i> (0.92)       | <i>R6046</i> (0.16)        | <i>TUB</i> (0.33)          | <i>R6046</i> (2.38)        |
|           | 3    | <i>GAPDH</i> (0.74)        | <i>TEF1F</i> (0.60)        | <i>TEF1F</i> (2.40)        | <i>R6046</i> (0.96)        | <i>TEF1F</i> (0.29)        | <i>TEF1F</i> (0.34)        | <i>APRT</i> (2.38)         |
|           | 4    | <i>APRT</i> (0.81)         | <i>R6046</i> (0.65)        | <i>R6046</i> (2.57)        | <i>TUB</i> (0.93)          | <i>APRT</i> (0.45)         | <i>R6046</i> (0.39)        | <i>TEF1F</i> (2.71)        |
|           | 5    | <i>TUB</i> (0.82)          | <i>GAPDH</i> (0.85)        | <i>GAPDH</i> (3.26)        | <i>TEF1F</i> (0.93)        | <i>TUB</i> (0.45)          | <i>GAPDH</i> (0.49)        | <i>GAPDH</i> (2.94)        |
|           | 6    | <i>Ctsyn1</i> (0.98)       | <i>Ctsyn1</i> (1.30)       | <i>Ctsyn1</i> (4.78)       | <i>α-centractin</i> (0.92) | <i>Ctsyn1</i> (0.49)       | <i>Ctsyn1</i> (0.66)       | <i>Ctsyn1</i> (6.00)       |
|           | 7    | <i>α-centractin</i> (1.46) | <i>α-centractin</i> (1.49) | <i>α-centractin</i> (5.56) | <i>APRT</i> (0.88)         | <i>α-centractin</i> (0.97) | <i>α-centractin</i> (0.89) | <i>α-centractin</i> (7.00) |

The differences in rankings are open to interpretation by the scientific community and their selection of reference genes according to their preferred statistical algorithm.

**Supplementary Table S4: Comprehensive ranking of *Bsal* reference gene stability using different statistical algorithms.** Delta CT, BestKeeper, NormFinder, GeNorm and RefFinder were used to determine reference gene stability in *Bsal* spores day 0 (D0) (n = 6), sporangia day 3 (D3) (n = 6), mature sporangia day 5 (D5) (n = 6) and a combination of all life stages (D0+D3+D5) (n = 18). Candidate genes were ranked from most stable (1) to least stable (7).

| D0+D3+D5    | rank | ΔCT                        | Bestkeeper analysis        |                            |                            | NormFinder                 | GeNorm                     | RefFinder                  |
|-------------|------|----------------------------|----------------------------|----------------------------|----------------------------|----------------------------|----------------------------|----------------------------|
|             |      | SD                         | SD                         | CV                         | r                          | stability value            | M value                    | Geomean                    |
| <i>Bsal</i> | 1    | <i>α-centractin</i> (1.47) | <i>TUB</i> (0.59)          | <i>TUB</i> (2.50)          | <i>GAPDH</i> (0.96)        | <i>α-centractin</i> (0.45) | <i>APRT</i> (0.55)         | <i>α-centractin</i> (1.57) |
|             | 2    | <i>APRT</i> (1.69)         | <i>α-centractin</i> (0.70) | <i>α-centractin</i> (2.60) | <i>R6046</i> (0.96)        | <i>GAPDH</i> (0.75)        | <i>CtsynI</i> (0.61)       | <i>APRT</i> (2.21)         |
|             | 3    | <i>GAPDH</i> (1.72)        | <i>APRT</i> (0.79)         | <i>APRT</i> (2.72)         | <i>TEF1F</i> (0.94)        | <i>APRT</i> (0.85)         | <i>α-centractin</i> (0.68) | <i>TUB</i> (2.63)          |
|             | 4    | <i>TUB</i> (1.78)          | <i>CtsynI</i> (0.93)       | <i>CtsynI</i> (3.32)       | <i>α-centractin</i> (0.92) | <i>TUB</i> (0.85)          | <i>TUB</i> (0.87)          | <i>CtsynI</i> (3.16)       |
|             | 5    | <i>CtsynI</i> (1.86)       | <i>GAPDH</i> (2.01)        | <i>GAPDH</i> (8.60)        | <i>TUB</i> (0.58)          | <i>R6046</i> (1.03)        | <i>GAPDH</i> (1.39)        | <i>GAPDH</i> (3.50)        |
|             | 6    | <i>R6046</i> (1.97)        | <i>R6046</i> (2.34)        | <i>R6046</i> (9.30)        | <i>APRT</i> (0.53)         | <i>CtsynI</i> (1.04)       | <i>R6046</i> (1.64)        | <i>R6046</i> (6.00)        |
|             | 7    | <i>TEF1F</i> (2.28)        | <i>TEF1F</i> (2.63)        | <i>TEF1F</i> (11.30)       | <i>CtsynI</i> (0.43)       | <i>TEF1F</i> (1.16)        | <i>TEF1F</i> (1.82)        | <i>TEF1F</i> (7.00)        |

| D0          | rank | ΔCT                        | Bestkeeper analysis        |                            |                            | NormFinder                 | GeNorm                     | RefFinder                  |
|-------------|------|----------------------------|----------------------------|----------------------------|----------------------------|----------------------------|----------------------------|----------------------------|
|             |      | SD                         | SD                         | CV                         | r                          | stability value            | M value                    | Geomean                    |
| <i>Bsal</i> | 1    | <i>α-centractin</i> (0.43) | <i>TUB</i> (0.48)          | <i>TUB</i> (2.05)          | <i>GAPDH</i> (0.99)        | <i>α-centractin</i> (0.09) | <i>GAPDH</i> (0.27)        | <i>α-centractin</i> (1.86) |
|             | 2    | <i>R6046</i> (0.46)        | <i>GAPDH</i> (0.74)        | <i>α-centractin</i> (3.22) | <i>α-centractin</i> (0.99) | <i>R6046</i> (0.13)        | <i>α-centractin</i> (0.28) | <i>R6046</i> (1.86)        |
|             | 3    | <i>GAPDH</i> (0.47)        | <i>R6046</i> (0.80)        | <i>APRT</i> (3.56)         | <i>TEF1F</i> (0.99)        | <i>APRT</i> (0.15)         | <i>R6046</i> (0.28)        | <i>GAPDH</i> (2.21)        |
|             | 4    | <i>APRT</i> (0.48)         | <i>α-centractin</i> (0.85) | <i>GAPDH</i> (3.57)        | <i>CtsynI</i> (0.99)       | <i>GAPDH</i> (0.18)        | <i>APRT</i> (0.33)         | <i>TUB</i> (3.83)          |
|             | 5    | <i>TEF1F</i> (0.56)        | <i>APRT</i> (1.02)         | <i>R6046</i> (3.68)        | <i>R6046</i> (0.98)        | <i>TEF1F</i> (0.27)        | <i>TEF1F</i> (0.39)        | <i>APRT</i> (3.94)         |
|             | 6    | <i>TUB</i> (0.71)          | <i>TEF1F</i> (1.14)        | <i>CtsynI</i> (4.82)       | <i>APRT</i> (0.98)         | <i>TUB</i> (0.46)          | <i>TUB</i> (0.46)          | <i>TEF1F</i> (5.23)        |
|             | 7    | <i>CtsynI</i> (0.80)       | <i>CtsynI</i> (1.35)       | <i>TEF1F</i> (5.83)        | <i>TUB</i> (0.95)          | <i>CtsynI</i> (0.52)       | <i>CtsynI</i> (0.56)       | <i>CtsynI</i> (7.00)       |

| D3          | rank | ΔCT                        | Bestkeeper analysis        |                            |                            | NormFinder                 | GeNorm                     | RefFinder                  |
|-------------|------|----------------------------|----------------------------|----------------------------|----------------------------|----------------------------|----------------------------|----------------------------|
|             |      | SD                         | SD                         | CV                         | r                          | stability value            | M value                    | Geomean                    |
| <i>Bsal</i> | 1    | <i>TEF1F</i> (0.76)        | <i>APRT</i> (0.28)         | <i>APRT</i> (0.97)         | <i>GAPDH</i> (0.97)        | <i>TEF1F</i> (0.15)        | <i>CtsynI</i> (0.22)       | <i>TEF1F</i> (2.00)        |
|             | 2    | <i>α-centractin</i> (0.79) | <i>CtsynI</i> (0.37)       | <i>CtsynI</i> (1.34)       | <i>R6046</i> (0.93)        | <i>TUB</i> (0.21)          | <i>APRT</i> (0.23)         | <i>APRT</i> (2.11)         |
|             | 3    | <i>TUB</i> (0.83)          | <i>α-centractin</i> (0.42) | <i>α-centractin</i> (1.52) | <i>TEF1F</i> (0.92)        | <i>α-centractin</i> (0.36) | <i>α-centractin</i> (0.24) | <i>CtsynI</i> (2.51)       |
|             | 4    | <i>CtsynI</i> (0.88)       | <i>TEF1F</i> (0.51)        | <i>TEF1F</i> (1.93)        | <i>TUB</i> (0.89)          | <i>APRT</i> (0.51)         | <i>TEF1F</i> (0.43)        | <i>α-centractin</i> (2.71) |
|             | 5    | <i>APRT</i> (0.88)         | <i>TUB</i> (0.66)          | <i>TUB</i> (2.76)          | <i>α-centractin</i> (0.69) | <i>CtsynI</i> (0.52)       | <i>TUB</i> (0.56)          | <i>TUB</i> (3.50)          |
|             | 6    | <i>GAPDH</i> (1.05)        | <i>GAPDH</i> (0.98)        | <i>GAPDH</i> (3.83)        | <i>CtsynI</i> (0.38)       | <i>GAPDH</i> (0.55)        | <i>GAPDH</i> (0.75)        | <i>GAPDH</i> (6.00)        |
|             | 7    | <i>R6046</i> (1.45)        | <i>R6046</i> (1.38)        | <i>R6046</i> (5.06)        | <i>APRT</i> (0.35)         | <i>R6046</i> (0.96)        | <i>R6046</i> (0.95)        | <i>R6046</i> (7.00)        |

| D5          | rank | ΔCT                        | Bestkeeper analysis        |                            |                            | NormFinder                 | GeNorm                     | RefFinder                  |
|-------------|------|----------------------------|----------------------------|----------------------------|----------------------------|----------------------------|----------------------------|----------------------------|
|             |      | SD                         | SD                         | CV                         | r                          | stability value            | M value                    | Geomean                    |
| <i>Bsal</i> | 1    | <i>TUB</i> (0.54)          | <i>α-centractin</i> (0.53) | <i>α-centractin</i> (1.91) | <i>TUB</i> (0.99)          | <i>TUB</i> (0.09)          | <i>TUB</i> (0.27)          | <i>TUB</i> (1.19)          |
|             | 2    | <i>APRT</i> (0.63)         | <i>TUB</i> (0.55)          | <i>APRT</i> (2.08)         | <i>TEF1F</i> (0.94)        | <i>α-centractin</i> (0.26) | <i>α-centractin</i> (0.30) | <i>α-centractin</i> (1.57) |
|             | 3    | <i>α-centractin</i> (0.64) | <i>APRT</i> (0.62)         | <i>TUB</i> (2.38)          | <i>α-centractin</i> (0.93) | <i>APRT</i> (0.28)         | <i>APRT</i> (0.32)         | <i>APRT</i> (2.71)         |
|             | 4    | <i>R6046</i> (0.75)        | <i>CtsynI</i> (0.85)       | <i>CtsynI</i> (2.94)       | <i>GAPDH</i> (0.92)        | <i>R6046</i> (0.39)        | <i>GAPDH</i> (0.54)        | <i>R6046</i> (4.47)        |
|             | 5    | <i>GAPDH</i> (0.77)        | <i>R6046</i> (0.90)        | <i>R6046</i> (3.43)        | <i>R6046</i> (0.91)        | <i>GAPDH</i> (0.43)        | <i>R6046</i> (0.61)        | <i>GAPDH</i> (5.14)        |
|             | 6    | <i>TEF1F</i> (0.78)        | <i>TEF1F</i> (0.92)        | <i>TEF1F</i> (3.88)        | <i>APRT</i> (0.88)         | <i>TEF1F</i> (0.43)        | <i>TEF1F</i> (0.64)        | <i>TEF1F</i> (6.00)        |
|             | 7    | <i>CtsynI</i> (0.87)       | <i>GAPDH</i> (0.99)        | <i>GAPDH</i> (4.13)        | <i>CtsynI</i> (0.74)       | <i>CtsynI</i> (0.55)       | <i>CtsynI</i> (0.71)       | <i>CtsynI</i> (6.09)       |

The differences in rankings are open to interpretation by the scientific community and their selection of reference genes according to their preferred statistical algorithm.

**Supplementary Table S5: Descriptive statistics of 7 *Bd* and *Bsal* candidate reference genes' expression based on the BestKeeper approach.**

|             |                             |                     | <i>TEF1F</i> | <i><math>\alpha</math>-centractin</i> | <i>Ctsyn1</i> | <i>GAPDH</i> | <i>R6046</i> | <i>TUB</i> | <i>APRT</i> |
|-------------|-----------------------------|---------------------|--------------|---------------------------------------|---------------|--------------|--------------|------------|-------------|
| <i>Bd</i>   | All growth stages: D0+D3+D5 | geo Mean [CP]       | 25.68        | 27.31                                 | 27.52         | 26.92        | 26.22        | 26.31      | 26.83       |
|             |                             | min [CP]            | 23.41        | 24.58                                 | 25.02         | 23.87        | 23.66        | 24.19      | 24.42       |
|             |                             | max [CP]            | 27.61        | 30.7                                  | 29.96         | 29.91        | 28.57        | 28.11      | 28.83       |
|             |                             | std dev [+/- CP]    | 0.72         | 1.27                                  | 1.34          | 1.29         | 1.19         | 0.82       | 1.00        |
|             |                             | CV [% CP]           | 2.79         | 4.65                                  | 4.86          | 4.77         | 4.52         | 3.10       | 3.71        |
|             |                             | coeff. of corr. [r] | 0.753        | 0.90                                  | 0.94          | 0.97         | 0.962        | 0.88       | 0.89        |
|             | Fresh spores D0             | geo Mean [CP]       | 26.16        | 28.69                                 | 29.07         | 28.73        | 27.99        | 27.49      | 28.27       |
|             |                             | min [CP]            | 25.27        | 27.98                                 | 28.47         | 28.06        | 27.41        | 27.11      | 27.76       |
|             |                             | max [CP]            | 27.61        | 29.41                                 | 29.96         | 29.91        | 28.57        | 28.11      | 28.83       |
|             |                             | std dev [+/- CP]    | 0.80         | 0.46                                  | 0.53          | 0.56         | 0.352        | 0.28       | 0.33        |
|             |                             | CV [% CP]           | 3.04         | 1.61                                  | 1.83          | 1.96         | 1.26         | 1.01       | 1.17        |
|             |                             | coeff. of corr. [r] | 0.89         | 0.93                                  | 0.981         | 0.934        | 0.888        | 0.64       | 0.88        |
|             | Sporangia D3                | geo Mean [CP]       | 25.95        | 26.59                                 | 26.51         | 26.00        | 25.37        | 26.32      | 26.77       |
|             |                             | min [CP]            | 24.76        | 26.15                                 | 26.14         | 24.29        | 24.24        | 26.08      | 26.47       |
|             |                             | max [CP]            | 26.3         | 27.29                                 | 27.24         | 26.87        | 26.2         | 26.58      | 27.37       |
|             |                             | std dev [+/- CP]    | 0.40         | 0.40                                  | 0.27          | 0.57         | 0.43         | 0.14       | 0.24        |
|             |                             | CV [% CP]           | 1.53         | 1.52                                  | 1.03          | 2.20         | 1.69         | 0.54       | 0.91        |
|             |                             | coeff. of corr. [r] | 0.90         | 0.78                                  | 0.79          | 0.89         | 0.95         | -0.30      | 0.11        |
|             | Mature sporangia D5         | geo Mean [CP]       | 24.94        | 26.68                                 | 27.03         | 26.11        | 25.39        | 25.18      | 25.55       |
|             |                             | min [CP]            | 23.41        | 24.58                                 | 25.02         | 23.87        | 23.66        | 24.19      | 24.42       |
|             |                             | max [CP]            | 25.84        | 30.70                                 | 29.56         | 27.71        | 26.54        | 25.79      | 26.28       |
|             |                             | std dev [+/- CP]    | 0.60         | 1.49                                  | 1.30          | 0.85         | 0.65         | 0.41       | 0.51        |
|             |                             | CV [% CP]           | 2.40         | 5.56                                  | 4.78          | 3.26         | 2.57         | 1.64       | 2.01        |
|             |                             | coeff. of corr. [r] | 0.93         | 0.92                                  | 0.97          | 0.98         | 0.96         | 0.93       | 0.88        |
| <i>Bsal</i> | All growth stages: D0+D3+D5 | geo Mean [CP]       | 23.07        | 27.07                                 | 28.04         | 23.26        | 24.97        | 23.46      | 28.84       |
|             |                             | min [CP]            | 17.71        | 24.82                                 | 25.74         | 19.49        | 20.44        | 22.41      | 26.97       |
|             |                             | max [CP]            | 27.18        | 28.43                                 | 30.73         | 26.82        | 29.02        | 24.63      | 30.99       |
|             |                             | std dev [+/- CP]    | 2.63         | 0.70                                  | 0.93          | 2.01         | 2.34         | 0.59       | 0.79        |

|                     |                     |       |       |       |       |       |       |       |
|---------------------|---------------------|-------|-------|-------|-------|-------|-------|-------|
|                     | CV [% CP]           | 11.30 | 2.60  | 3.33  | 8.60  | 9.30  | 2.50  | 2.72  |
|                     | coeff. of corr. [r] | 0.94  | 0.915 | 0.433 | 0.961 | 0.956 | 0.579 | 0.527 |
| Fresh spores D0     | geo Mean [CP]       | 19.52 | 26.13 | 27.84 | 20.56 | 21.77 | 23.40 | 28.49 |
|                     | min [CP]            | 17.71 | 24.82 | 25.74 | 19.49 | 20.44 | 22.62 | 26.97 |
|                     | max [CP]            | 21.04 | 27.21 | 29.88 | 21.73 | 23.26 | 24.28 | 29.85 |
|                     | std dev [+/- CP]    | 1.14  | 0.84  | 1.35  | 0.735 | 0.80  | 0.48  | 1.02  |
|                     | CV [% CP]           | 5.83  | 3.22  | 4.82  | 3.57  | 3.68  | 2.05  | 3.56  |
|                     | coeff. of corr. [r] | 0.99  | 0.99  | 0.99  | 0.99  | 0.98  | 0.95  | 0.98  |
| Sporangia D3        | geo Mean [CP]       | 26.46 | 27.42 | 27.43 | 25.46 | 27.29 | 23.80 | 28.39 |
|                     | min [CP]            | 25.21 | 26.87 | 26.73 | 22.94 | 24.08 | 22.52 | 27.86 |
|                     | max [CP]            | 27.18 | 28.09 | 28.00 | 26.82 | 29.02 | 24.63 | 29.06 |
|                     | std dev [+/- CP]    | 0.51  | 0.42  | 0.37  | 0.98  | 1.38  | 0.66  | 0.28  |
|                     | CV [% CP]           | 1.93  | 1.52  | 1.34  | 3.83  | 5.06  | 2.76  | 0.97  |
|                     | coeff. of corr. [r] | 0.92  | 0.69  | 0.38  | 0.97  | 0.93  | 0.89  | 0.35  |
| Mature sporangia D5 | geo Mean [CP]       | 23.77 | 27.68 | 28.87 | 24.02 | 26.21 | 23.19 | 29.66 |
|                     | min [CP]            | 21.87 | 26.94 | 28.08 | 22.67 | 25.25 | 22.41 | 28.78 |
|                     | max [CP]            | 25.53 | 28.43 | 30.73 | 25.59 | 28.07 | 24.4  | 30.99 |
|                     | std dev [+/- CP]    | 0.92  | 0.53  | 0.85  | 0.99  | 0.90  | 0.55  | 0.62  |
|                     | CV [% CP]           | 3.88  | 1.91  | 2.94  | 4.13  | 3.43  | 2.38  | 2.08  |
|                     | coeff. of corr. [r] | 0.94  | 0.93  | 0.74  | 0.92  | 0.91  | 0.99  | 0.88  |

**Supplementary Table S6: Summary of the suggested reference genes.** Based on the obtained results and the different statistical algorithms used in the manuscript (Delta CT, BestKeeper, NormFinder, GeNorm and RefFinder), a summary is made of possible reference gene combinations. Both for *Bd* and *Bsal* an overview is given of what reference genes could be used when assessing target gene expression in spores day 0 (D0), sporangia day 3 (D3), mature sporangia day 5 (D5) and in *Bd* or *Bsal*-infected skin tissue.

|                                    | number | <i>Bd</i>           | <i>Bsal</i>         |
|------------------------------------|--------|---------------------|---------------------|
| Spores D0                          | 1      | <i>Ctsyn1</i>       | <i>GAPDH</i>        |
|                                    | 2      | <i>α-centractin</i> | <i>α-centractin</i> |
| Sporangia D3                       | 1      | <i>α-centractin</i> | <i>Ctsyn1</i>       |
|                                    | 2      | <i>Ctsyn1</i>       | <i>APRT</i>         |
|                                    | 3      | <i>R6046</i>        |                     |
| Mature sporangia D5                | 1      | <i>APRT</i>         | <i>TUB</i>          |
|                                    | 2      | <i>TUB</i>          | <i>α-centractin</i> |
| Infected tissue ( <i>in vivo</i> ) | 1      | <i>APRT</i>         | <i>GAPDH</i>        |
|                                    | 2      | <i>TUB</i>          | <i>TUB</i>          |
|                                    | 3      | <i>R6046</i>        | <i>R6046</i>        |
|                                    | 4      | <i>GAPDH</i>        | <i>α-centractin</i> |

**Supplementary Table S7: List of genes and sequences of the primers used for quantitative PCR analysis.**

|             | Gene                | Forward primer        | Reverse primer           | Amplicon size (bp) | E (%) | R <sup>2</sup> | Slope      | Melt T | Ref             |
|-------------|---------------------|-----------------------|--------------------------|--------------------|-------|----------------|------------|--------|-----------------|
| <i>Bd</i>   | <i>α-centractin</i> | GCAGCATGGAGTTGTCACTG  | AGCTTGGTCACGATTGGAAC     | 145                | 91,9  | 0,997          | -<br>3,533 | 81,5   | [5]             |
|             | <i>Ctsyn1</i>       | TCCTCAGCAGCTCCTATTTCG | CTCGACGTCCTTTTTTCAGGA    | 262                | 93,3  | 0,998          | -<br>3,493 | 82,5   | this manuscript |
|             | <i>APRT</i>         | GGTTGCCACTTGGAGTCTGT  | ATGGCTGGATGGAAACTCTG     | 97                 | 96,9  | 0,998          | -<br>3,399 | 81,0   | this manuscript |
|             | <i>R6046</i>        | GTCGTA CTGGCAACCTCACC | ACATTGGGAGCAATCTCGAC     | 79                 | 96    | 0,997          | -<br>3,422 | 81,0   | [5]             |
|             | <i>TEF1F</i>        | CCTTCCCGTCCTACTGACAA  | GAACAGTTCGATTCTCCA       | 76                 | 93,7  | 0,999          | -<br>3,484 | 79,5   | [5]             |
|             | <i>TUB</i>          | CTCTCGGTGGTGGTACTGGT  | AGGGTATTCTCGCGAATCT      | 68                 | 100,3 | 0,994          | -<br>3,315 | 80,0   | this manuscript |
|             | <i>GAPDH</i>        | AAGCCTGCCAAGTACGAAGA  | AAAGATGGAGCTGCGAGTGT     | 135                | 94,3  | 0,995          | -<br>3,466 | 84,0   | [5]             |
| <i>Bsal</i> | <i>α-centractin</i> | CCGGCTACCATTTTCATACG  | CGATCGATGGGTAGCACTCT     | 116                | 97,9  | 0,995          | -<br>3,375 | 80,0   | [5]             |
|             | <i>Ctsyn1</i>       | CGCCAGAAGCATCTCTTTTC  | AACTCGTCCCAGTTGTCAGC     | 149                | 99,6  | 0,986          | -<br>3,332 | 83,5   | this manuscript |
|             | <i>APRT</i>         | GGAAACAGACCCAGCTACCA  | GTTCCGACCATATCCACCAC     | 99                 | 87,2  | 0,997          | -<br>3,672 | 84,0   | this manuscript |
|             | <i>R6046</i>        | GTTGCCAAGTCTGCTGTGAA  | ATCAAGCGAGGGTGCAGAC      | 87                 | 90,2  | 0,997          | -<br>3,582 | 81,5   | [5]             |
|             | <i>TEF1F</i>        | TCCCACTGACAAACCTCTCC  | CGACAGGTACTGTTCCAATACCAC | 74                 | 95,3  | 0,994          | -<br>3,439 | 78,5   | [5]             |
|             | <i>TUB</i>          | AAGAGCCAACGACACCAATC  | GAAGGACTGGGTGCTGAAGA     | 99                 | 99    | 0,995          | -<br>3,347 | 79,5   | this manuscript |
|             | <i>GAPDH</i>        | GCCAGCAAAATACGAGGAGA  | CCATTCATGGGTCCATTAGC     | 63                 | 94    | 0,999          | -<br>3,475 | 77,5   | [5]             |
